# Supplementary material
Source: MDPI journal article supplement (https://www.mdpi.com/2571-8789/2/1/1)
Supplement: s1 [file s1]

# Supplementary Materials For:

## Effects of Ionic Strength on Arsenate Adsorption at Aluminum Hydroxide-Water Interface

Tingying Xu <sup>1</sup>, Jeffrey G. Catalano <sup>1,\*</sup>

<sup>1</sup> Department of Earth and Planetary Sciences, Washington University, 1 Brookings Drive, Saint Louis, MO 63130; xutingying@wustl.edu

\* Correspondence: catalano@eps.wustl.edu; Tel.: +01-314-935-6015

|                                                                                                                                                                     |      |
|---------------------------------------------------------------------------------------------------------------------------------------------------------------------|------|
| This Supporting Materials document include pages, figure, and tables:                                                                                               | page |
| - <b>FIGURES</b>                                                                                                                                                    | 2    |
| - Figure S1: Single Langmuir isotherm fits to arsenate adsorption                                                                                                   | 2    |
| - Figure S2: Correlations of Dual Langmuir fitting parameters<br>( $K_1$ , $K_2$ , $\Gamma_{\max,1}$ , and $\Gamma_{\max,2}$ ) versus square root of ionic strength | 3    |
| - <b>TABLES</b>                                                                                                                                                     | 4    |
| - Table S1: Fitting parameters for Single Langmuir isotherms                                                                                                        | 4    |

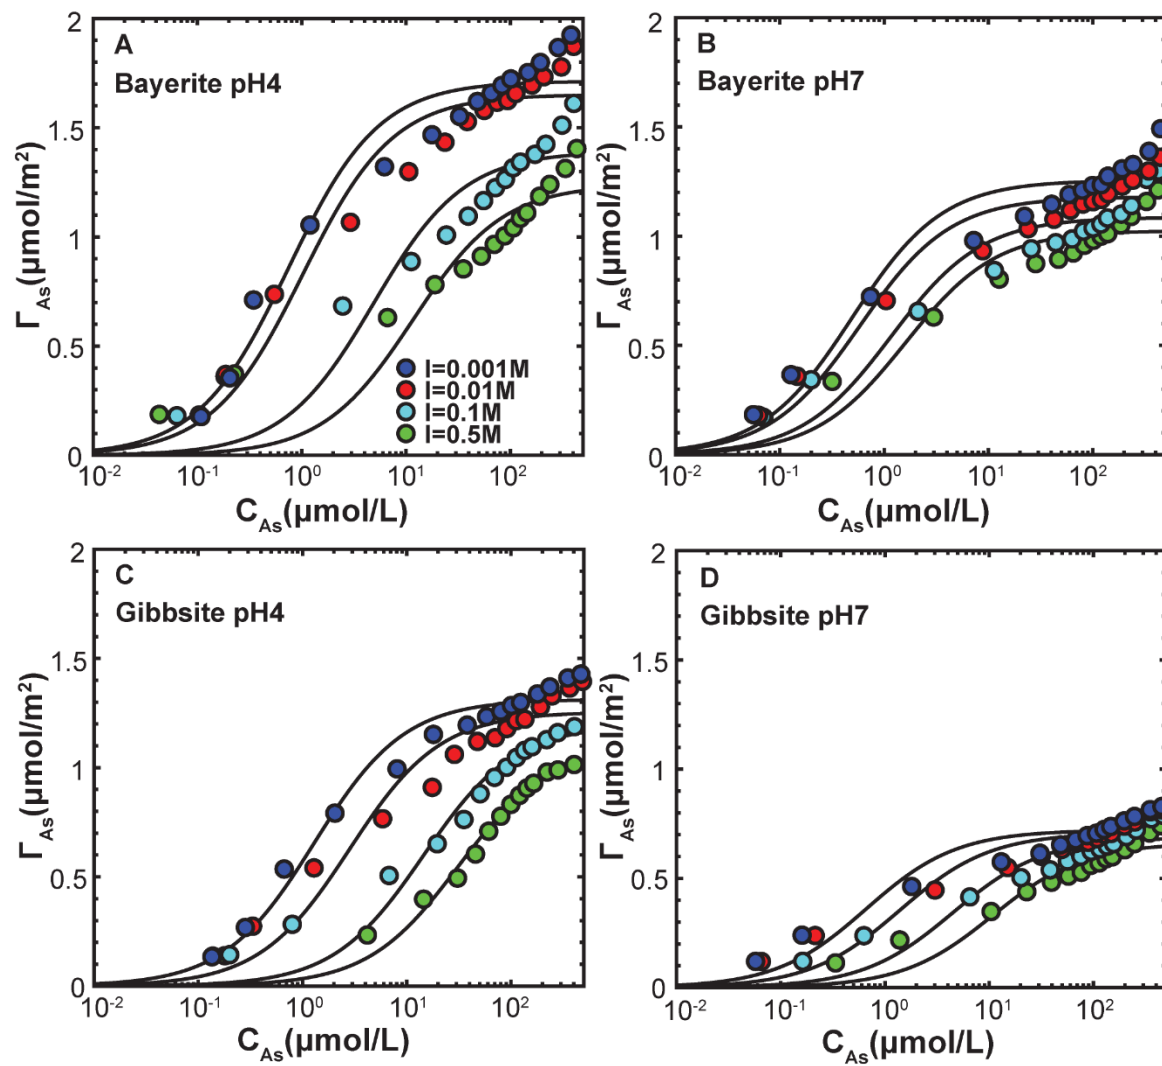

**Figure S1.** Single Langmuir isotherm fits (black lines) to arsenate adsorption in different ionic strength on bayerite (A) pH 4 and (B) pH 7, on gibbsite at (C) pH 4 and (D) pH 7. Detailed fitting parameters are summed in Table S1.

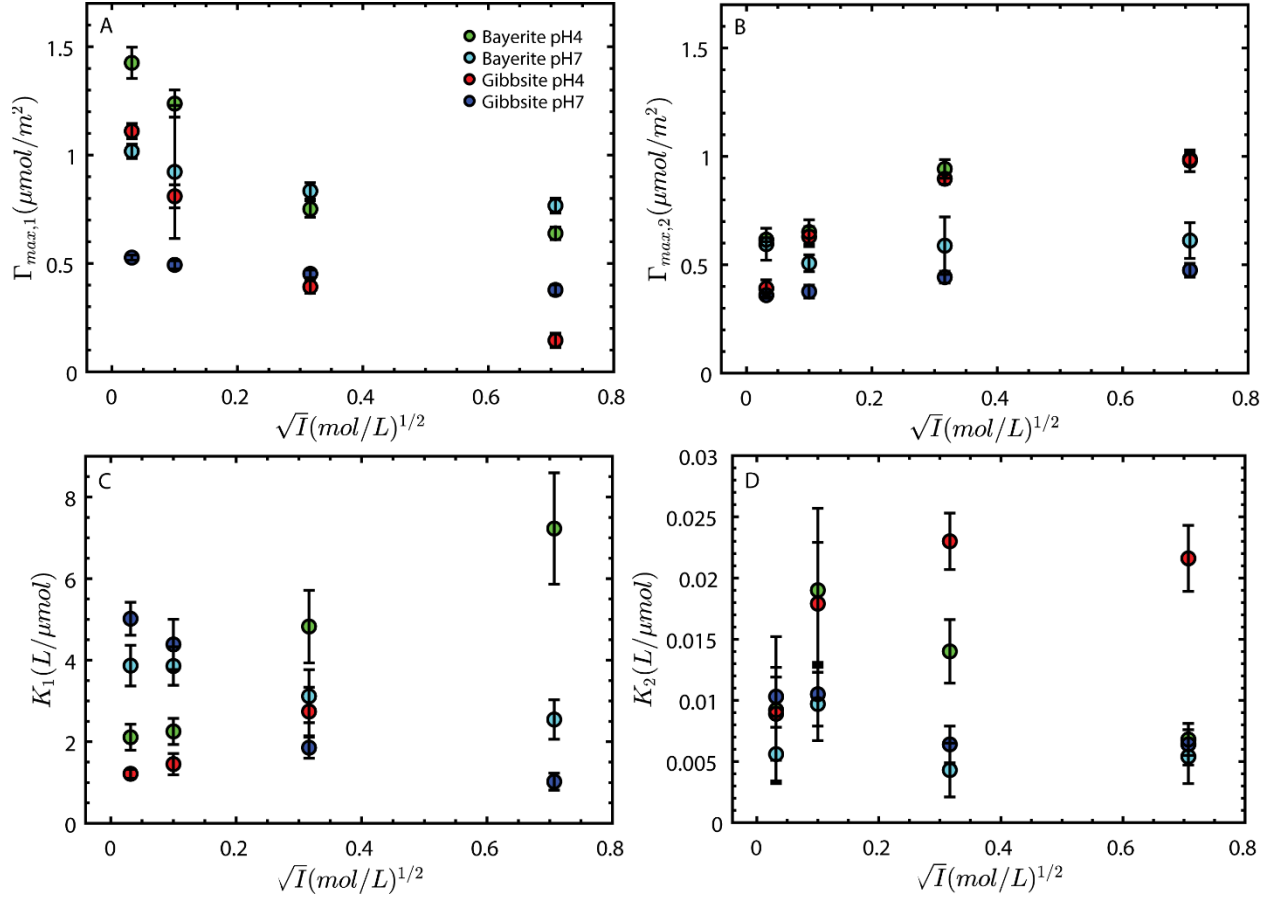

**Figure S2.** Correlations of Dual Langmuir fitting parameters (A)  $\Gamma_{\max,1}$ , (B)  $\Gamma_{\max,2}$ , (C)  $K_1$  and (D)  $K_2$  versus square root of ionic strength.

**Table S1.** Fitting parameters for Single Langmuir isotherms

| <b>Mineral</b> | <b>Ionic Strength<br/>(mol/L)</b> | <b><math>\Gamma_{\max}</math><br/>(<math>\mu\text{mol}/\text{m}^2</math>)</b> | <b>K<br/>(L/<math>\mu\text{mol}</math>)</b> | <b>R-factor <sup>a</sup></b> |
|----------------|-----------------------------------|-------------------------------------------------------------------------------|---------------------------------------------|------------------------------|
| Bayerite pH 4  | 0.5                               | 1.24 $\pm$ 0.08                                                               | 0.09 $\pm$ 0.04                             | 0.12                         |
| Bayerite pH 4  | 0.1                               | 1.39 $\pm$ 0.07                                                               | 0.20 $\pm$ 0.08                             | 0.11                         |
| Bayerite pH 4  | 0.01                              | 1.65 $\pm$ 0.05                                                               | 0.98 $\pm$ 0.26                             | 0.074                        |
| Bayerite pH 4  | 0.001                             | 1.71 $\pm$ 0.04                                                               | 1.34 $\pm$ 0.29                             | 0.067                        |
| Bayerite pH 7  | 0.5                               | 1.03 $\pm$ 0.04                                                               | 0.62 $\pm$ 0.26                             | 0.094                        |
| Bayerite pH 7  | 0.1                               | 1.09 $\pm$ 0.04                                                               | 0.85 $\pm$ 0.38                             | 0.096                        |
| Bayerite pH 7  | 0.01                              | 1.18 $\pm$ 0.03                                                               | 1.71 $\pm$ 0.55                             | 0.077                        |
| Bayerite pH 7  | 0.001                             | 1.26 $\pm$ 0.04                                                               | 2.02 $\pm$ 0.66                             | 0.079                        |
| Gibbsite pH 4  | 0.5                               | 1.09 $\pm$ 0.04                                                               | 0.032 $\pm$ 0.005                           | 0.043                        |
| Gibbsite pH 4  | 0.1                               | 1.19 $\pm$ 0.02                                                               | 0.07 $\pm$ 0.04                             | 0.065                        |
| Gibbsite pH 4  | 0.01                              | 1.26 $\pm$ 0.04                                                               | 0.35 $\pm$ 0.10                             | 0.086                        |
| Gibbsite pH 4  | 0.001                             | 1.31 $\pm$ 0.03                                                               | 0.77 $\pm$ 0.13                             | 0.054                        |
| Gibbsite pH 7  | 0.5                               | 0.66 $\pm$ 0.03                                                               | 0.092 $\pm$ 0.03                            | 0.091                        |
| Gibbsite pH 7  | 0.1                               | 0.69 $\pm$ 0.03                                                               | 0.22 $\pm$ 0.09                             | 0.099                        |
| Gibbsite pH 7  | 0.01                              | 0.71 $\pm$ 0.03                                                               | 0.72 $\pm$ 0.09                             | 0.097                        |
| Gibbsite pH 7  | 0.001                             | 0.72 $\pm$ 0.02                                                               | 1.51 $\pm$ 0.02                             | 0.095                        |

<sup>a</sup> Goodness-of-fit parameter. The R-factor is the sum of the differences between the data and the fit at each data point, divided by the sum of the data at each corresponding point. Smaller R-factor values reflect better fits.
